# Supplementary material for: Highly efficient photosynthesis of hydrogen peroxide by a stable Zr(iv)-based MOF with a diamino-functionalized ligand
Source: Royal Society of Chemistry journal article supplement (doi:10.1039/d3dt03237j), 2024-01-01
Supplement: d3dt03237j1.pdf [file d3dt03237j1.pdf]

## Supporting Information

### Highly Efficient Photosynthesis of Hydrogen Peroxide by a stable Zr(IV)-based MOF with a Diamino Functionalized Ligand

Qixiang Zhai, Yanwei Ren,\* Haosen Wang, Cheng Liu, Ze Li and Huanfeng Jiang

*Key Laboratory of Functional Molecular Engineering of Guangdong Province, School of Chemistry and Chemical Engineering, South China University of Technology, Guangzhou, 510641, Guangdong, P. R. China*

\*Corresponding Author: Yanwei Ren, Email: renyw@scut.edu.cn

#### 1. Experimental Section

##### Materials and characterization methods

Organic reagents were purchased commercially and were used without further purification. 2-amino-4,4'-biphenyldicarboxylic acid ( $H_2L^1$ ) and 2,2'-diamino-4,4'-biphenyldicarboxylic acid ( $H_2L^2$ ) were synthesized according to the previously reported methods with slight modification (Scheme S1 and Fig. S1-S6).<sup>1-4</sup>  $^1H$  and  $^{13}C$  NMR were recorded on a Bruker Model AM-400 (400 MHz) spectrometer. Powder X-ray diffraction patterns were recorded with a Smartlab model X-ray diffractometer with Cu K $\alpha$  radiation ( $\lambda=1.5406 \text{ \AA}$ ). The morphology of samples was observed using a Hitachi SU8220 scanning electron microscope. Ultraviolet visible diffuse reflectance spectra were collected by a U-3010 spectrophotometer, barium sulfate ( $BaSO_4$ ) was used as the reference. Thermogravimetric analyses experiments were collected on TGA 500. The Brunauer-Emmett-Teller specific surface area measurements were conducted by a Micromeritics ASAP 2460 at 77K and the pore size distribution was calculated from the nonlocal density functional theory method. The Mott-Schottky plots, electrochemical

impedance spectroscopy and photocurrent tests were completed by using the CHI 760E. X-ray photoelectron spectroscopy was obtained with a Thermo Scientific K-Alpha XPS. Electron paramagnetic resonance spectra were measured on a Bruker Elexsys-II E500 spectrometer.

## Synthesis of Ligands

The synthesis route of 2-amino[1,1'-biphenyl]-4,4'-dicarboxylic acid ( $H_2L^1$ ) and 2,2'-diamino[1,1'-biphenyl]-4,4'-dicarboxylic acid ( $H_2L^2$ ) was shown in Scheme S1.

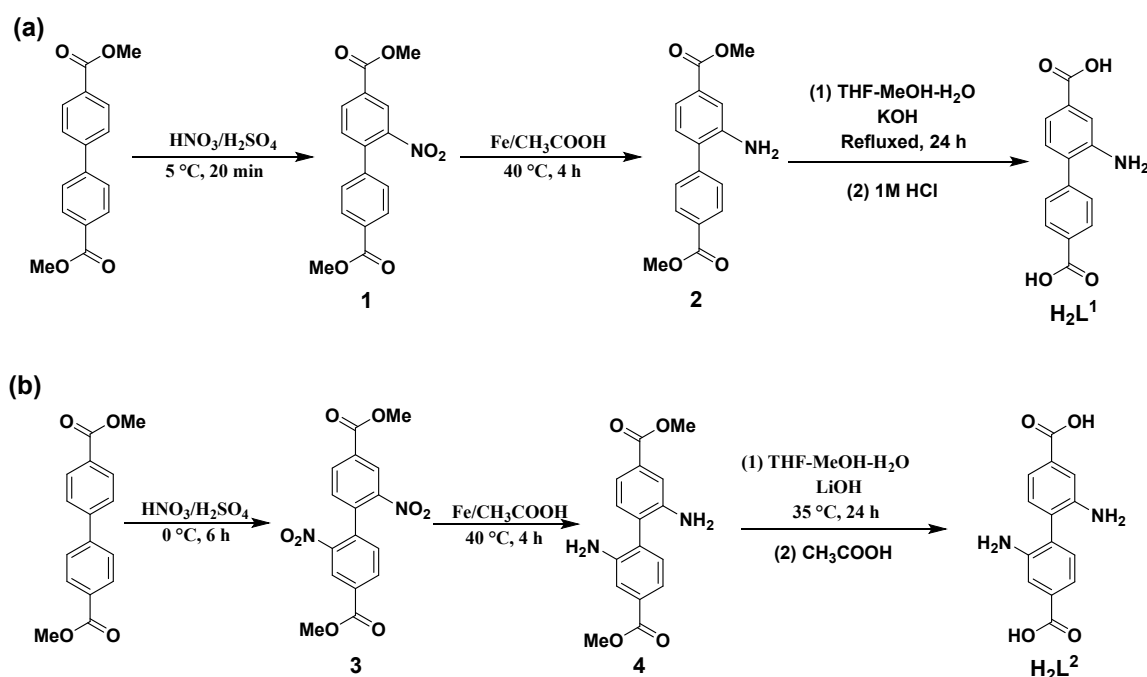

**Scheme S1** Synthesis route of  $H_2L^1$  and  $H_2L^2$

**4,4'-Dimethyl 2-nitro[1,1'-biphenyl]-4,4'-dicarboxylate (1)** Dimethyl 4,4'-biphenyldicarboxylate (2 g, 7.40 mmol) was dissolved in 15 mL of concentrated  $H_2SO_4$  and cooled to below 5 °C. A mixture of concentrated  $HNO_3$  (482  $\mu$ L, 7.40 mmol) and concentrated  $H_2SO_4$  (3 mL) was added and the reaction was carried out at a controlled temperature below 5 °C for 20 min. After reaction, the solution was poured into ice water (500 ml) and the solid was washed with water until pH=7, dried under vacuum to obtain a white product (1.96 g, yield: 84%).  $^1H$  NMR (400 MHz, Chloroform-*d*)  $\delta$  8.55 (d,  $J$  = 1.7 Hz, 1H), 8.28 (dd,  $J$  = 8.0, 1.7 Hz, 1H), 8.11 (d,  $J$  = 8.4 Hz, 2H), 7.53 (d,  $J$  = 8.0 Hz, 1H), 7.39 (d,  $J$  = 8.4 Hz, 2H), 3.99 (s, 3H), 3.94 (s, 3H).  $^{13}C$  NMR (101 MHz, Chloroform-*d*)  $\delta$  166.56, 164.81, 149.06, 141.18, 139.59,

133.23, 132.22, 131.14, 130.60, 130.16, 127.99, 125.61, 52.98, 52.44.

**4,4'-Dimethyl 2-amino[1,1'-biphenyl]-4,4'-dicarboxylate (2)** 4,4'-Dimethyl 2-nitro[1,1'-biphenyl]-4,4'-dicarboxylate (1.80 g, 5.70 mmol) was dissolved in 50 ml of glacial acetic acid, iron powder (6.40 g, 114 mmol) was added and stirred for 4 hours at 40 °C. The mixture was filtered through a Brinell funnel and extracted with ethyl acetate, the solvent was centrifuged, washed with water and saturated sodium carbonate solution and dried under vacuum to obtain the product (1.06 g, yield: 65%). <sup>1</sup>H NMR (400 MHz, Chloroform-*d*) δ 8.12 (d, *J* = 8.3 Hz, 2H), 7.55 (d, *J* = 8.3 Hz, 2H), 7.52 (d, *J* = 7.9 Hz, 1H), 7.49 (s, 1H), 7.20 (d, *J* = 7.9 Hz, 1H), 3.94 (s, 3H), 3.92 (s, 3H). <sup>13</sup>C NMR (101 MHz, Chloroform-*d*) δ 167.12, 166.89, 143.39, 143.16, 130.95, 130.89, 130.53, 130.37, 129.63, 129.04, 120.19, 117.08, 52.39, 52.31.

**2-Amino[1,1'-biphenyl]-4,4'-dicarboxylic acid (H<sub>2</sub>L<sup>1</sup>)** 4,4'-Dimethyl 2-amino[1,1'-biphenyl]-4,4'-dicarboxylate (990 mg, 3.47 mmol) was dissolved in a mixture of THF (35 mL) and MeOH (25 mL), and the above solution was mixed with KOH (2 g, 35.7 mmol) in 40 mL of water and refluxed overnight. The reaction solution was concentrated under vacuum and diluted with water, acidified with 1 M HCl to pH = 2, filtered, washed with water and dried to obtain H<sub>2</sub>BPDC-NH<sub>2</sub> (839 mg, yield: 94%). <sup>1</sup>H NMR (400 MHz, DMSO-*d*<sub>6</sub>) δ 12.83 (s, 2H), 8.02 (d, *J* = 8.0 Hz, 2H), 7.58 (d, *J* = 8.1 Hz, 2H), 7.41 (d, *J* = 1.6 Hz, 1H), 7.21 (dd, *J* = 8.0, 1.6 Hz, 1H), 7.11 (d, *J* = 7.9 Hz, 1H), 5.17 (s, 2H).

**4,4'-Dimethyl 2,2'-dinitro[1,1'-biphenyl]-4,4'-dicarboxylate (3)** Dimethyl 4,4'-biphenyldicarboxylate (2.7 g, 10 mmol) was dissolved in 25 mL of concentrated H<sub>2</sub>SO<sub>4</sub> and cooled to below 5 °C. A mixture of concentrated HNO<sub>3</sub> (1.4 mL) and concentrated H<sub>2</sub>SO<sub>4</sub> (1.6 mL) was added and the reaction was carried out at a controlled temperature below 5 °C for 6 hours. After reaction, the solution was poured into ice water and the solid was washed with water until pH=7, dried under vacuum to obtain 4,4'-Dimethyl 2,2'-dinitro[1,1'-biphenyl]-4,4'-dicarboxylate (3.24 g, yield: 90%). <sup>1</sup>H NMR (400 MHz, Chloroform-*d*) δ 8.90 (d, *J* = 1.6 Hz, 2H), 8.36 (dd, *J* = 7.9, 1.7 Hz, 2H), 7.40 (d, *J* = 7.9 Hz, 2H), 4.02 (s, 6H).

**4,4'-Dimethyl 2,2'-diamino[1,1'-biphenyl]-4,4'-dicarboxylate (4)** 4,4'-Dimethyl 2,2'-dinitro[1,1'-biphenyl]-4,4'-dicarboxylate (1.81 g, 5 mmol) was dissolved in 50 ml of glacial

acetic acid, iron powder (8.42 g, 150 mmol) was added and stirred for 4 hours at 40 °C. The mixture was filtered through a Brinell funnel and extracted with ethyl acetate, the solvent was centrifuged, washed with water and saturated sodium carbonate solution and dried under vacuum to obtain the product (1.28 g, yield: 85%). <sup>1</sup>H NMR (400 MHz, DMSO-d<sub>6</sub>) δ 7.45 (d, J = 1.7 Hz, 2H), 7.23 (dd, J = 7.9, 1.7 Hz, 2H), 7.08 (d, J = 7.9 Hz, 2H), 5.00 (s, 4H), 3.83 (s, 6H). <sup>13</sup>C NMR (101 MHz, DMSO-d<sub>6</sub>) δ 167.05, 146.08, 131.28, 130.12, 128.06, 117.66, 116.28, 52.41.

**2,2'-Diamino[1,1'-biphenyl]-4,4'-dicarboxylic acid (H<sub>2</sub>L<sup>2</sup>)** 4,4'-Dimethyl 2,2'-diamino[1,1'-biphenyl]-4,4'-dicarboxylate (864 mg, 2.88 mmol), THF (36 mL), MeOH (18 mL) and 36 mL of aqueous LiOH (0.6 M) were added to a round-bottom flask. The mixture was reacted at 35°C for 24h. The reaction solution was concentrated under vacuum and diluted with water, acidified with glacial acetic acid, filtered, washed with water and dried to obtain H<sub>2</sub>BPDC-(NH<sub>2</sub>)<sub>2</sub> (671 mg, yield: 86%). <sup>1</sup>H NMR (400 MHz, DMSO-d<sub>6</sub>) δ 12.66 (s, 2H), 7.42 (d, J = 1.7 Hz, 2H), 7.22 (dd, J = 7.8, 1.7 Hz, 2H), 7.05 (d, J = 7.9 Hz, 2H), 4.93 (s, 4H). <sup>13</sup>C NMR (101 MHz, DMSO-d<sub>6</sub>) δ 168.14, 145.90, 131.25, 131.10, 127.89, 117.98, 116.58.

### **Synthesis of UiO-67-NH<sub>2</sub> and UiO-67-(NH<sub>2</sub>)<sub>2</sub>**

UiO-67-NH<sub>2</sub> and UiO-67-(NH<sub>2</sub>)<sub>2</sub> were synthesized by following the previously reported methods with slight modification.<sup>5</sup> Specifically, ZrCl<sub>4</sub> (60 mg, 0.26 mmol), H<sub>2</sub>L<sup>1</sup> (64.30 mg, 0.25 mmol) and benzoic acid (940 mg, 7.70 mmol) were dispersed in 10 mL of N, N-dimethylformamide (DMF), then the mixture was placed in a Teflon liner and sonicated for 10 minutes. After 24 h of reaction at 120 °C, the powder was collected and washed with DMF and acetone. Finally, the product was dried under vacuum. The preparation method of UiO-67-(NH<sub>2</sub>)<sub>2</sub> is similar to that of UiO-67-NH<sub>2</sub>, except that ligand H<sub>2</sub>L<sup>2</sup> is used instead of H<sub>2</sub>L<sup>1</sup>.

### **Photocatalytic H<sub>2</sub>O<sub>2</sub> production**

MOFs based Photocatalyst (5 mg) was suspended in deionized water (5 mL) and oxygen atmosphere was provided by an oxygen balloon. The dispersion liquid was stirred in the dark for 0.5 hour and then a blue LED (40 W) was used as the light source. The concentration of

H<sub>2</sub>O<sub>2</sub> was measured by spectroscopic titration in an acidic solution of Ce(SO<sub>4</sub>)<sub>2</sub>.<sup>6</sup> To be specific, 2.5 mL of the reaction solution was centrifuged at 7500 rpm and then filtrated with a 0.22 μm filter to remove the photocatalyst. The sample was mixed with pre-prepared Ce(SO<sub>4</sub>)<sub>2</sub> solution (1 mM), and the yellow solution of Ce<sup>4+</sup> can be reduced by H<sub>2</sub>O<sub>2</sub> to produce colorless Ce<sup>3+</sup> (Eq. 1). The concentration of H<sub>2</sub>O<sub>2</sub> could be calculated from the change of Ce<sup>4+</sup> concentration (Eq. 2).

To get the calibration curve, Ce(SO<sub>4</sub>)<sub>2</sub> of different mass was dissolved in 0.5 M H<sub>2</sub>SO<sub>4</sub> and the absorption intensity was measured by UV-vis spectrometer (Fig. S7a). The linear relationship between absorption intensity and Ce<sup>4+</sup> concentration can be found in Fig. S7b). The absorption peak used for the measurement is 316 nm.

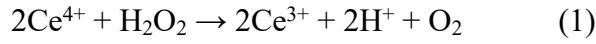

$$c(\text{H}_2\text{O}_2) = 1/2 \times c(\text{Ce}^{4+}) \quad (2)$$

## 2. Characterization Results

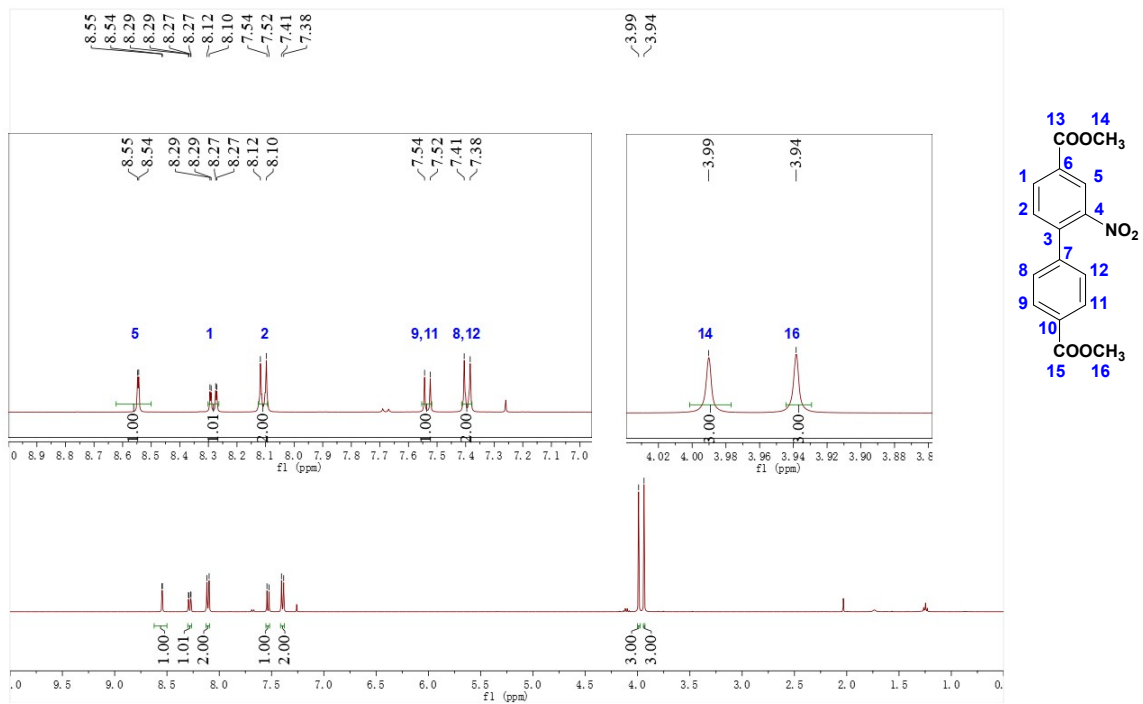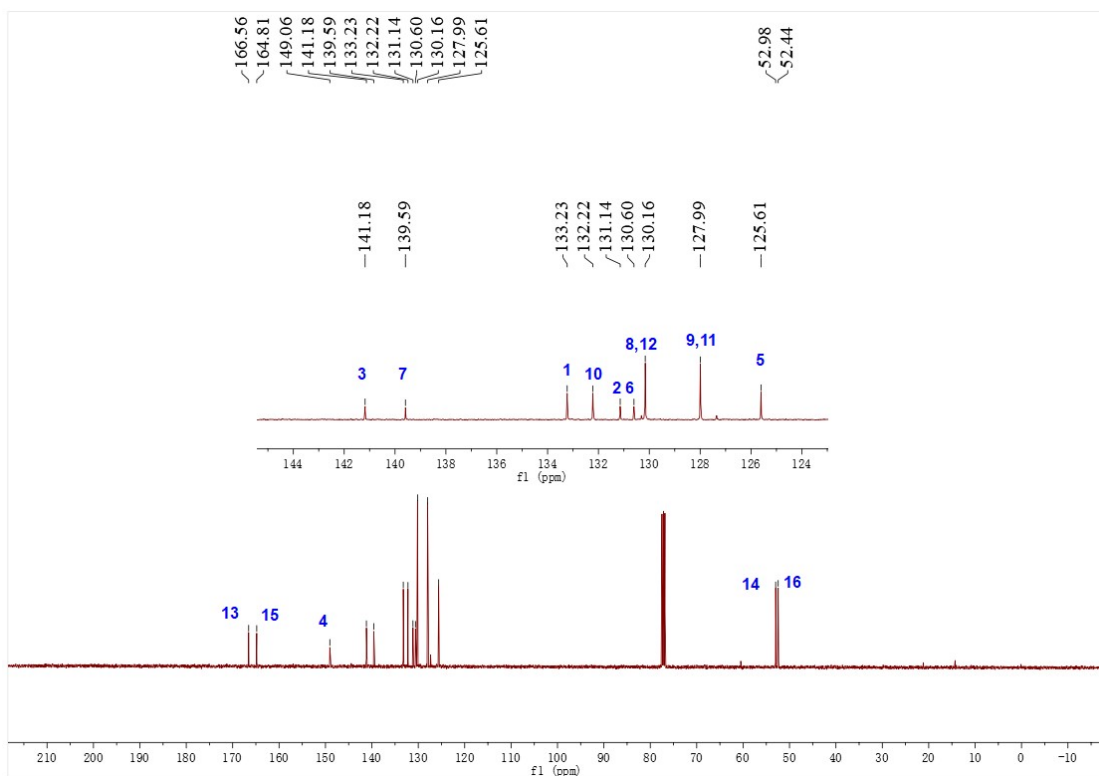

**Fig. S1** <sup>1</sup>H NMR and <sup>13</sup>C NMR of **1**

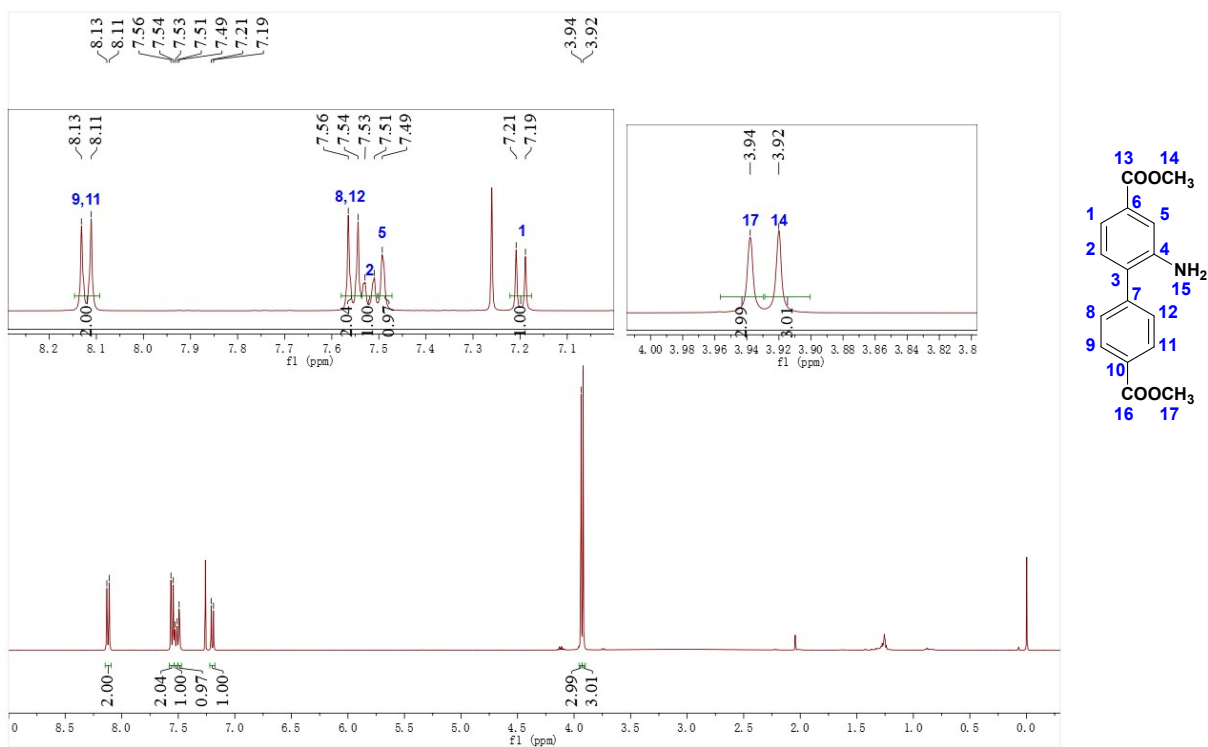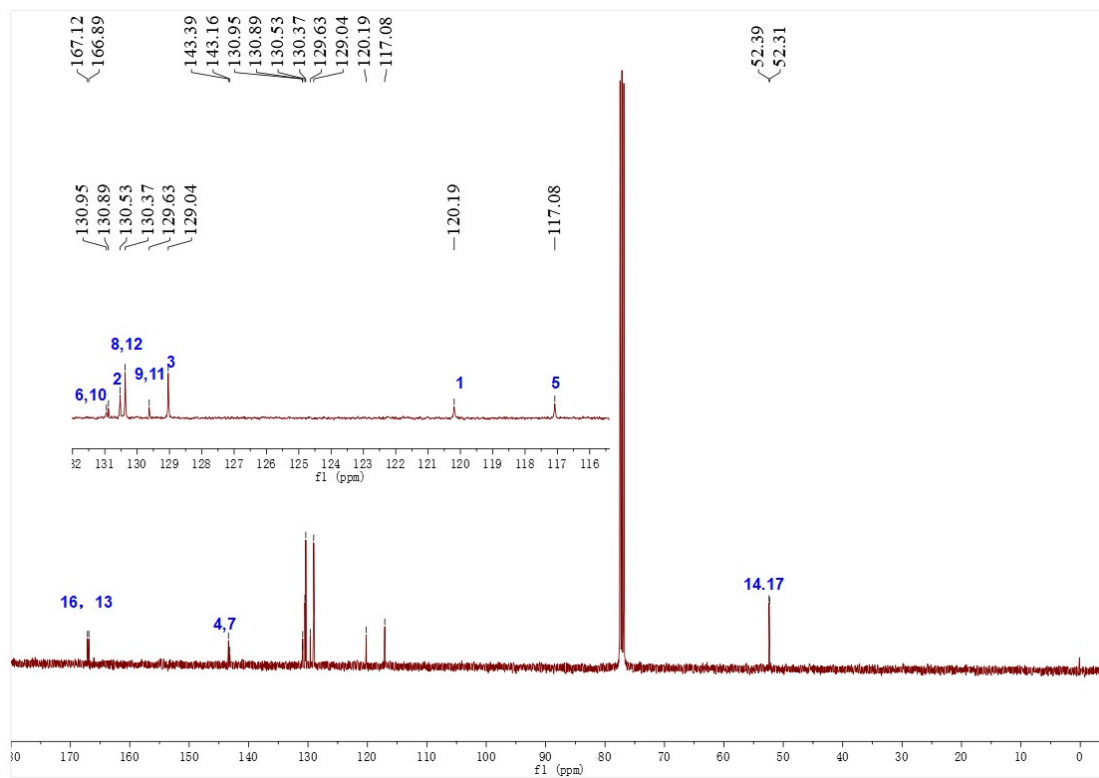

Fig. S2 <sup>1</sup>H NMR and <sup>13</sup>C NMR of 2

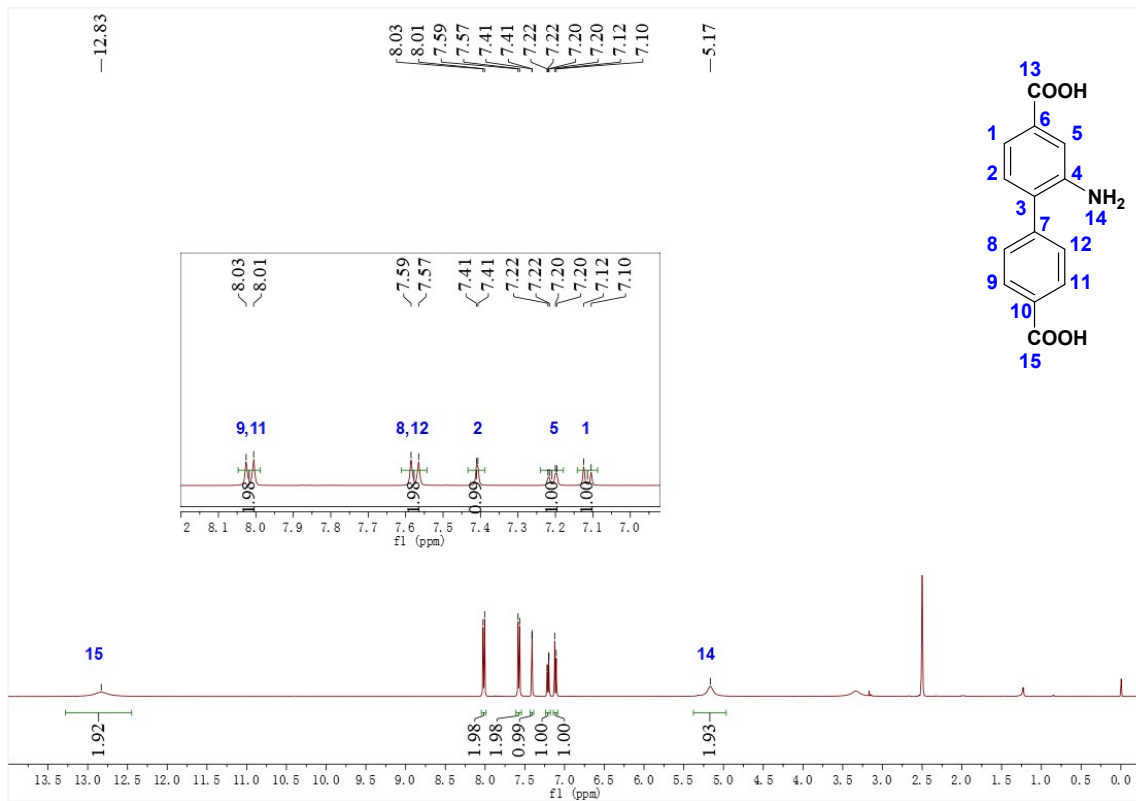

Fig. S3  $^1\text{H}$  NMR of  $\text{H}_2\text{L}^1$



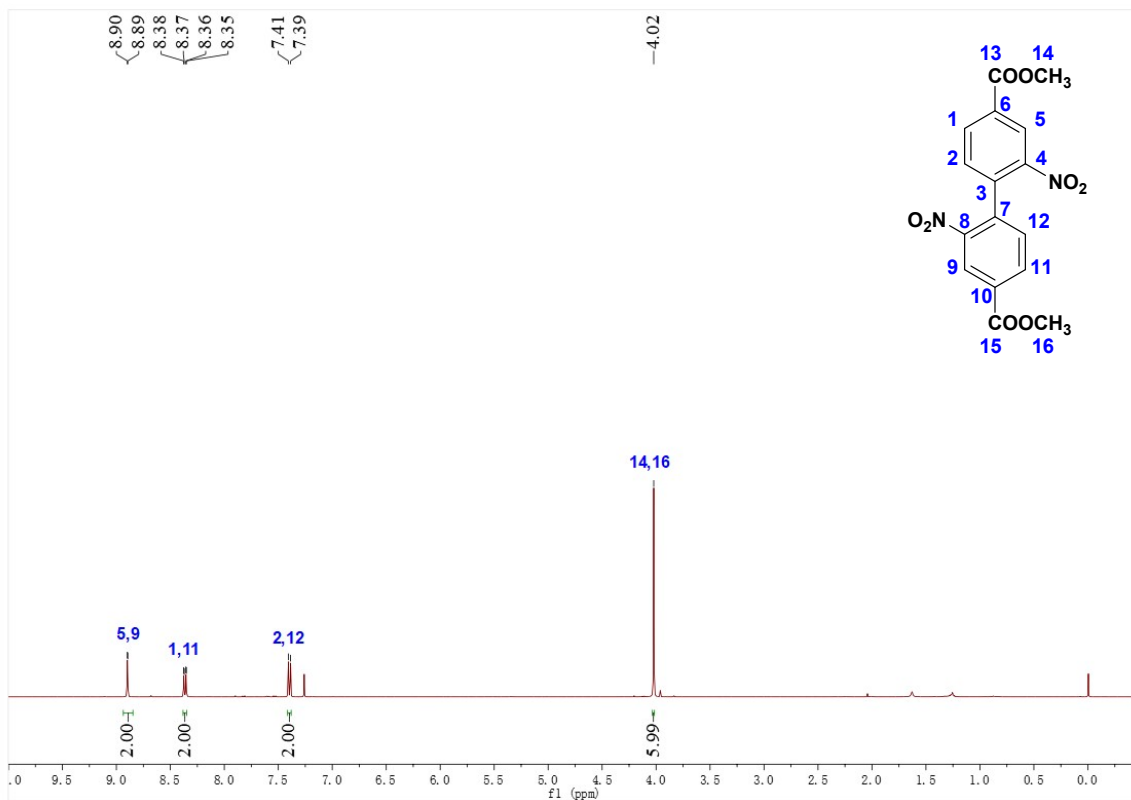

Fig. S4  $^1\text{H}$  NMR of 3

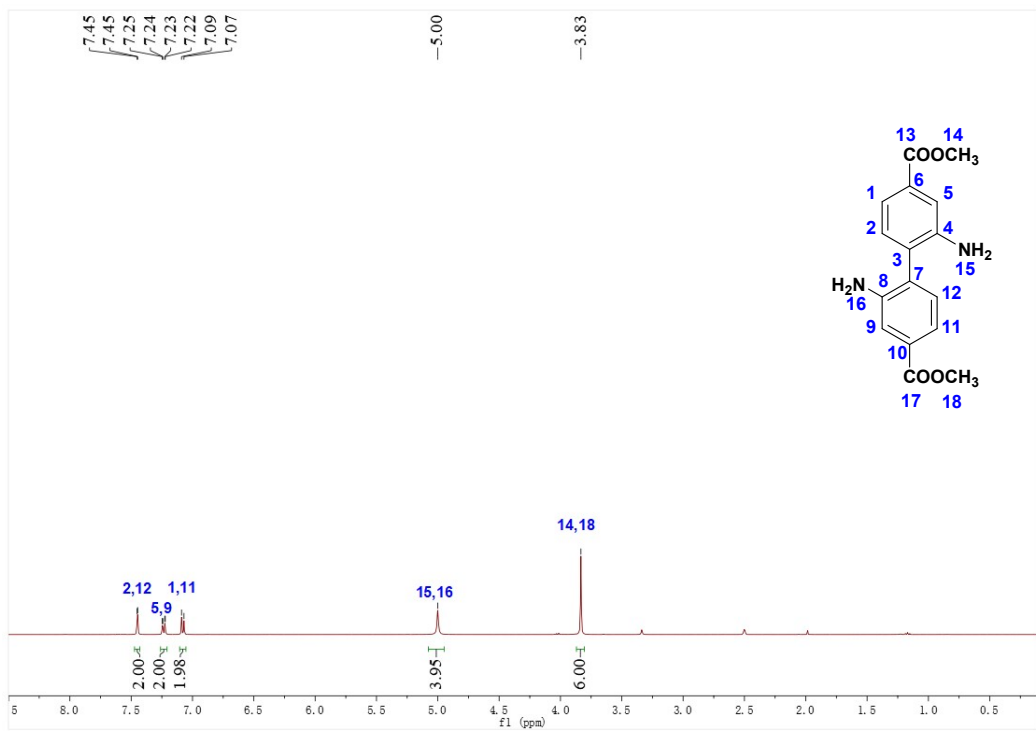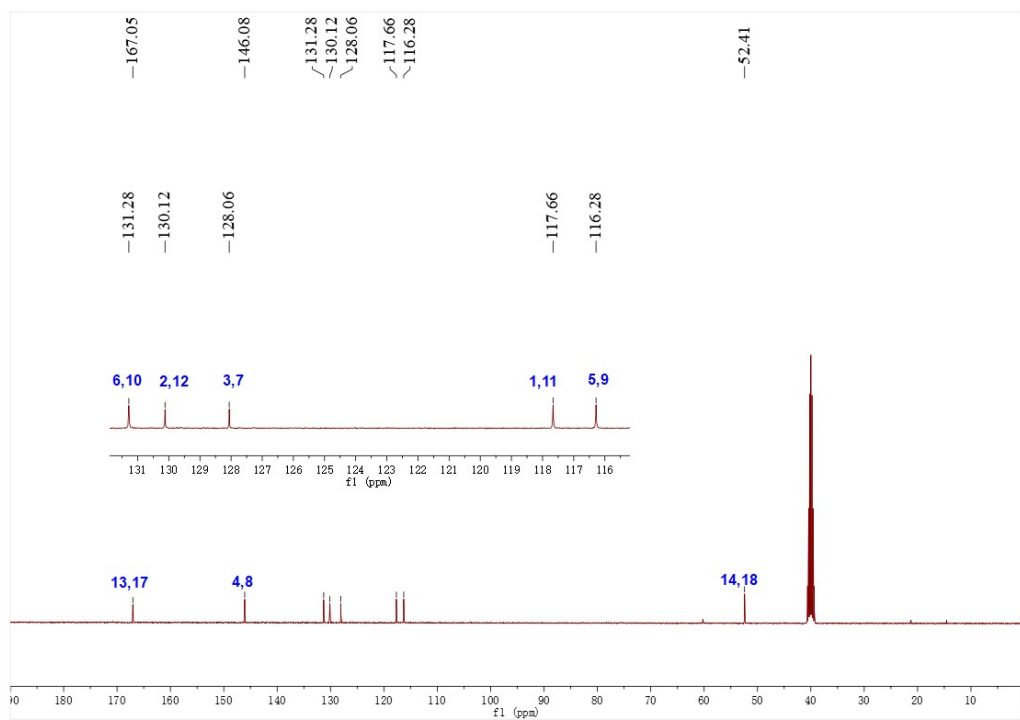

**Fig. S5** <sup>1</sup>H NMR and <sup>13</sup>C NMR of **4**

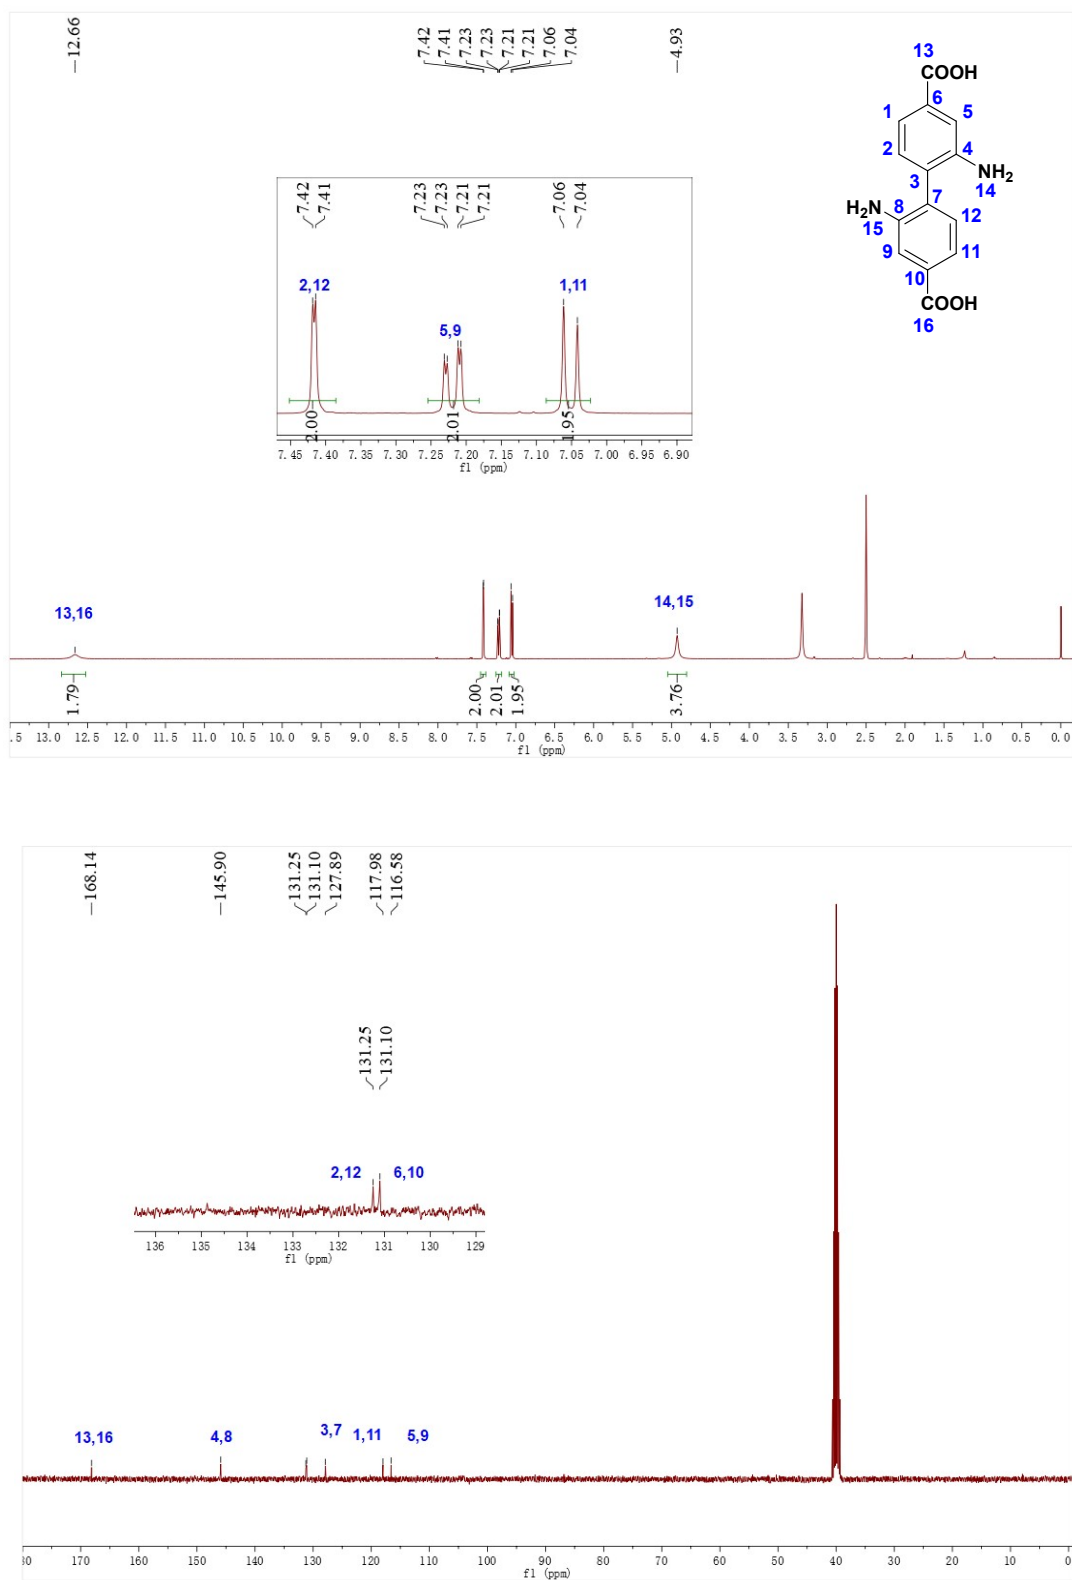

Fig. S6  $^1\text{H}$  NMR and  $^{13}\text{C}$  NMR of  $\text{H}_2\text{L}^2$

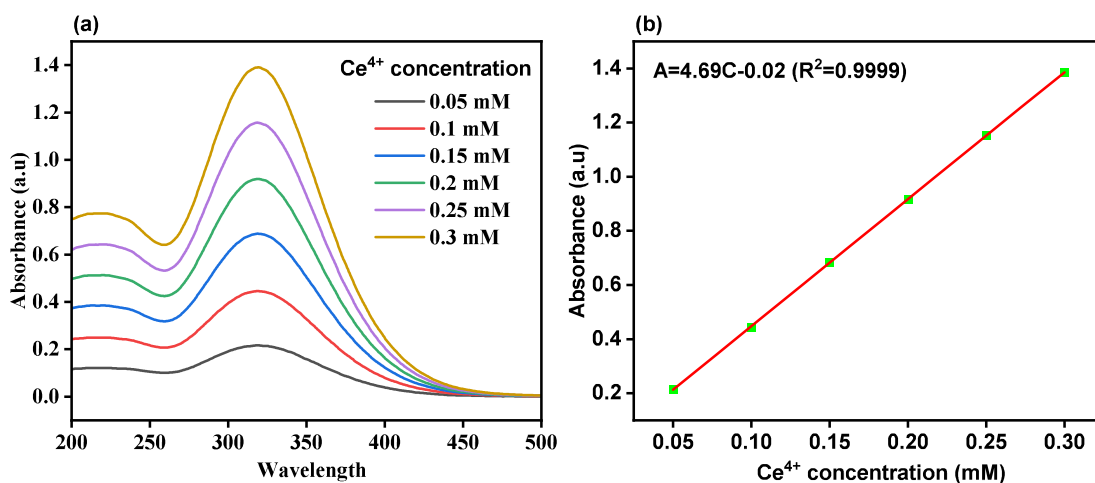

**Fig. S7** (a) UV-vis absorption spectra of  $\text{Ce}^{4+}$  solutions with different concentrations. (b) Corresponding calibration curve at the absorption peak of 316 nm.

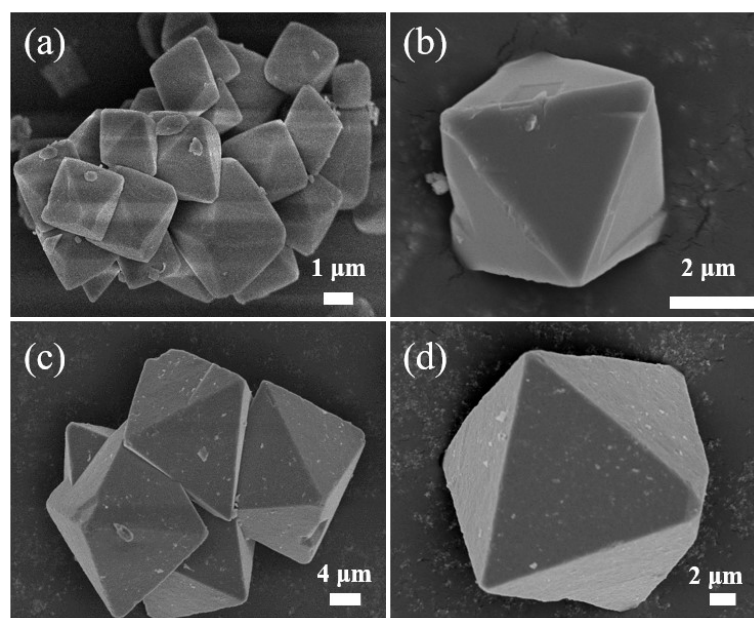

**Fig. S8** The SEM of (a) the whole and (b) the single octahedron of  $\text{UiO-67-(NH}_2)_2$ , The SEM of (c) the whole and (d) the single octahedron of  $\text{UiO-67-NH}_2$ .

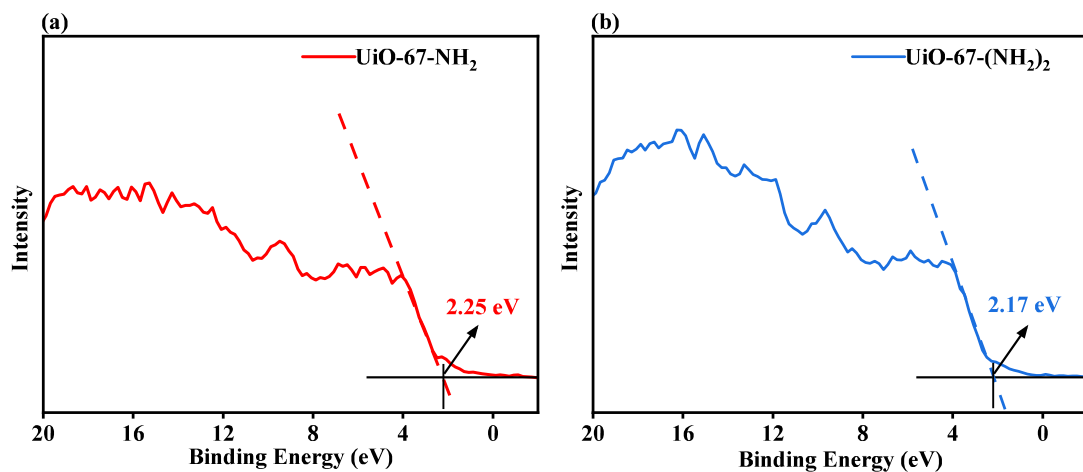

**Fig. S9** The XPS valence band spectra of (a) UiO-67-NH<sub>2</sub> and (b) UiO-67-(NH<sub>2</sub>)<sub>2</sub>.

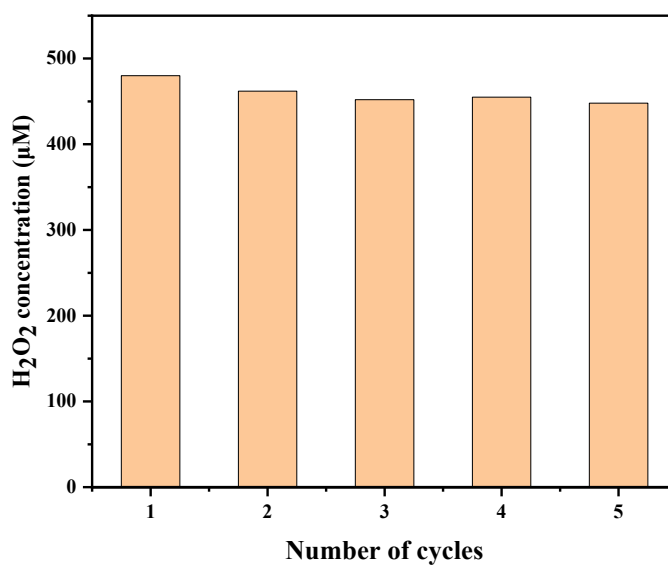

**Fig. S10** Cycling tests of UiO-67-(NH<sub>2</sub>)<sub>2</sub>.

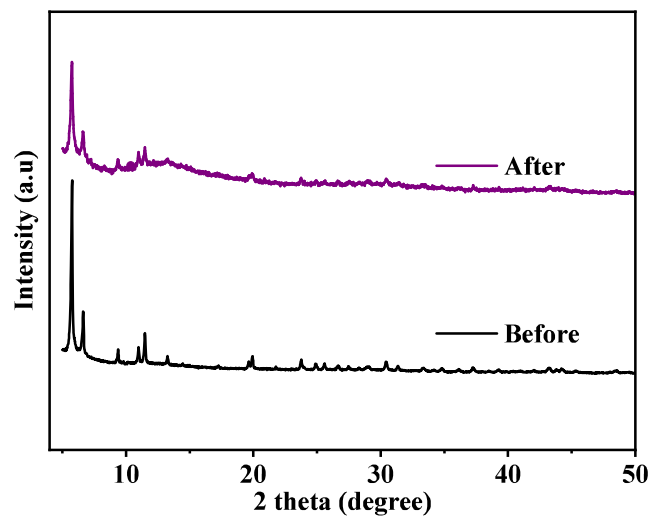

**Fig. S11** The PXRD patterns of UiO-67-(NH<sub>2</sub>)<sub>2</sub> before and after the reaction.

| Photocatalyst                          | Light source                           | H <sub>2</sub> O <sub>2</sub> yield<br>(mM·g <sup>-1</sup> <sub>cat</sub> ·h <sup>-1</sup> ) | Solvent | Gas            | Catalyst<br>amount<br>(g·L <sup>-1</sup> ) | Ref.             |
|----------------------------------------|----------------------------------------|----------------------------------------------------------------------------------------------|---------|----------------|--------------------------------------------|------------------|
| CTF-BDDBN                              | 500 W Xe lamp<br>λ>400 nm              | 1.94                                                                                         | water   | O <sub>2</sub> | 0.6                                        | 7                |
| MIL-111/001                            | 500 W Xe lamp<br>λ>400 nm              | 60.05                                                                                        | water   | O <sub>2</sub> | 0.4                                        | 8                |
| Ni-CAT-CN <sub>60</sub>                | Xe lamp<br>λ>420 nm                    | 120.07                                                                                       | water   | air            | 0.67                                       | 9                |
| COF-TfpBpy                             | 300 W Xe lamp<br>λ>420 nm              | 69.47                                                                                        | water   | air            | 1.5                                        | 10               |
| HEP-TAPT-COF                           | 300 W Xe lamp<br>λ>420 nm              | 16.9                                                                                         | water   | O <sub>2</sub> | 0.5                                        | 11               |
| C <sub>5</sub> N <sub>2</sub>          | 300 W Xe lamp<br>λ>400 nm              | 15.5                                                                                         | water   | O <sub>2</sub> | 10                                         | 12               |
| PQTEE-COP                              | 300 W Xe lamp<br>λ≥400 nm<br>40 W Blue | 100.3                                                                                        | water   | O <sub>2</sub> | 0.6                                        | 13               |
| UiO-67-(NH <sub>2</sub> ) <sub>2</sub> | LED<br>λ=427 nm                        | 96                                                                                           | water   | O <sub>2</sub> | 1                                          | <b>This work</b> |

**Table S1** Summary of the reaction condition of photocatalysts for H<sub>2</sub>O<sub>2</sub> production.



## References

- 1 C. Liu, T. Li and N. L. Rosi, *J. Am. Chem. Soc.*, 2012, **134**, 18886-18888.
- 2 C. Liu, T.-Y. Luo, E. S. Feura, C. Zhang and N. L. Rosi, *J. Am. Chem. Soc.*, 2015, **137**, 10508-10511.
- 3 N. Ko, J. Hong, S. Sung, K. E. Cordova, H. J. Park, J. K. Yang and J. Kim, *Dalton Trans.*, 2015, **44**, 2047-2051.
- 4 P. V. Dau and S. M. Cohen, *CrystEngComm*, 2013, **15**, 9304-9307.
- 5 M. Sun, X. Wang, Y. Li, H. Pan, M. Murugananthan, Y. Han, J. Wu, M. Zhang, Y. Zhang and Z. Kang, *ACS Catal.*, 2022, **12**, 2138-2149.
- 6 K. Wang, M. Wang, J. Yu, D. Liao, H. Shi, X. Wang and H. Yu, *ACS Appl. Nano Mater.*, 2021, **4**, 13158-13166.
- 7 L. Chen, L. Wang, Y. Wan, Y. Zhang, Z. Qi, X. Wu and H. Xu, *Adv. Mater.*, 2020, **32**, 1904433.
- 8 Y. Zheng, H. Zhou, B. Zhou, J. Mao and Y. Zhao, *Catal. Sci. Technol.*, 2022, **12**, 969-975.
- 9 Y. Zhao, Y. Liu, Z. Wang, Y. Ma, Y. Zhou, X. Shi, Q. Wu, X. Wang, M. Shao and H. Huang, *Appl. Catal., B*, 2021, **289**, 120035.
- 10 M. Kou, Y. Wang, Y. Xu, L. Ye, Y. Huang, B. Jia, H. Li, J. Ren, Y. Deng and J. Chen, *Angew. Chem., Int. Ed.*, 2022, **61**, e202200413.
- 11 D. Chen, W. Chen, Y. Wu, L. Wang, X. Wu, H. Xu and L. Chen, *Angew. Chem.*, 2023, **135**, e202217479.
- 12 J. Ma, X. Peng, Z. Zhou, H. Yang, K. Wu, Z. Fang, D. Han, Y. Fang, S. Liu and Y. Shen, *Angew. Chem., Int. Ed.*, 2022, **61**, e202210856.
- 13 X. Xu, H. Zhong, W. Huang, Y. Sui, R. Sa, W. Chen, G. Zhou, X. Li, D. Li and M. Wen, *Chem. Eng. J.*, 2023, **454**, 139929.
